# Supplementary material for: Dielectric Permittivity, AC Electrical Conductivity and Conduction Mechanism of High Crosslinked-Vinyl Polymers and Their Pd(OAc)2 Composites
Source: MDPI journal article supplement (doi:10.3390/polym13173005), 2021-09-05
Supplement: s1 [file s1]

## Supporting information

### Dielectric permittivity, AC electrical conductivity and conduction mechanism of high crosslinked-vinyl polymers and their Pd(OAc)<sub>2</sub> composites

Elsayed Elbayoumy <sup>1,\*</sup>, Nasser A. El-Ghamaz <sup>2</sup>, Farid Sh. Mohamed <sup>1</sup>, Mostafa A. Diab <sup>1</sup>, and Tamaki Nakano <sup>3,4,\*</sup>

<sup>1</sup> Chemistry department, Faculty of Science, Damietta University, New Damietta 34517, Egypt;.

<sup>2</sup> Physics department, Faculty of Science, Damietta University, New Damietta 34517, Egypt;.

<sup>3</sup> Institute for Catalysis and Graduate School of Chemical Sciences and Engineering, Hokkaido University, N21 W10, Kita-ku, Sapporo 001-0021, Japan;

<sup>4</sup> Integrated Research Consortium on Chemical Sciences (IRCCS), Institute for Catalysis, Hokkaido University, N21 W10, Kita-ku, Sapporo 001-0021, Japan

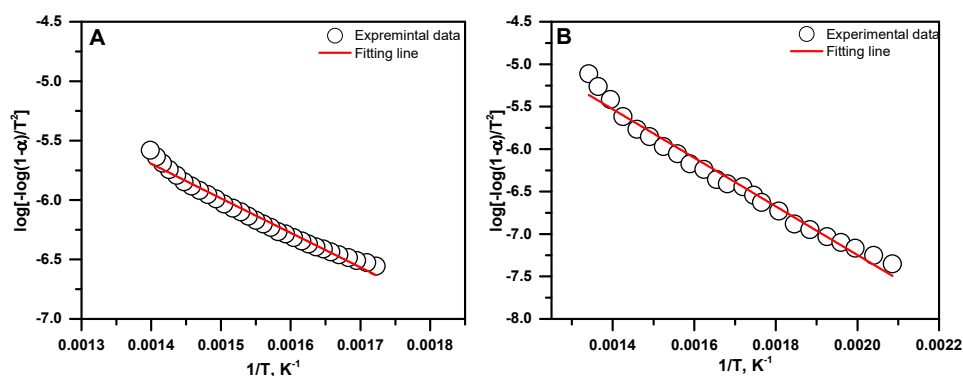

**Figure S1.** Coats-Redfern relationship for poly(EDMA) (A) and poly(EDMA-co-MMA) (B).
